# Supplementary material for: Influence of Socioeconomic Status on Oral Disease Burden: a Population-based Study
Source: Research Square preprint supplement (doi:10.21203/rs.3.rs-41112/v2), 2021-07-19
Supplement: Supplementary file 1 [file 37c2b74995df4ba6853f8f7d.pdf]

Table 1. Descriptive analysis of the participants according to their profiles.

| <b>Variables</b>                             | <b>N (%)</b>   |
|----------------------------------------------|----------------|
| <b>Skin color</b>                            |                |
| Nonwhite                                     | 6,386 (36.4)   |
| White                                        | 11,174 (63.6)  |
| <b>Family income</b>                         |                |
| Up to R\$1,500.00/month                      | 7,030 (40.0)   |
| Over R\$1,501.00/month                       | 7,988 (45.5)   |
| No information                               | 2,542 (14.5)   |
| <b>Education</b>                             |                |
| Primary education                            | 9,555 (54.4)   |
| Secondary or higher education                | 6,720 (38.3)   |
| No information                               | 1,285 (7.3)    |
| <b>OIDP</b>                                  |                |
| Impact of oral health on daily activities    | 6,829 (38.9)   |
| No impact of oral health on daily activities | 9,947 (56.6)   |
| No information                               | 784 (4.5)      |
| <b>Age group</b>                             |                |
| Teenager (15 to 19 years old)                | 5,558 (31.7)   |
| Adult (35 to 44 years old)                   | 6,051 (34.5)   |
| Elderly (65 to 74 year old)                  | 5,951 (33.9)   |
| <b>ODB</b>                                   |                |
| No ODB                                       | 2,280 (13.0)   |
| ODB                                          | 15,260 (86.9)  |
| No information                               | 20 (0.1)       |
| Total                                        | 17,560 (100.0) |
