# Supplementary material for: Influence of Socioeconomic Status on Oral Disease Burden: a Population-based Study
Source: Research Square preprint supplement (doi:10.21203/rs.3.rs-41112/v2), 2021-07-19
Supplement: Supplementary file 2 [file 635ebe727eb83f209c1517cf.pdf]

Table 3. Multivariate and adjusted binary logistic regression of the ODB indicator and the independent variables.

|                                              | B      | p-value | OR     | 95% confidence interval |        |
|----------------------------------------------|--------|---------|--------|-------------------------|--------|
|                                              |        |         |        | Lower                   | Lower  |
| <b>Skin color</b>                            |        |         |        |                         |        |
| White                                        | Ref.   |         | 1      |                         |        |
| Nonwhite                                     | 0.227  | < 0.001 | 1.255  | 1.180                   | 1.335  |
| <b>Family income</b>                         |        |         |        |                         |        |
| Up to R\$1,500.00/month                      | 0.179  | < 0.001 | 1.196  | 1.126                   | 1.271  |
| Over R\$1,501.00/month                       | Ref.   |         | 1      |                         |        |
| <b>Education</b>                             |        |         |        |                         |        |
| Primary education                            | 0.175  | < 0.001 | 1.191  | 1.120                   | 1.266  |
| Secondary or higher education                | Ref.   |         | 1      |                         |        |
| <b>OIDP</b>                                  |        |         |        |                         |        |
| No impact of oral health on daily activities | Ref.   |         | 1      |                         |        |
| Impact of oral health on daily activities    | 0.455  | < 0.001 | 1.576  | 1.479                   | 1.679  |
| <b>Age group</b>                             |        |         |        |                         |        |
| Teenager (15 to 19 years old)                | Ref.   |         | 1      |                         |        |
| Adult (35 to 44 years old)                   | -0.115 | 0.270   | 0.892  | 0.727                   | 1.093  |
| Elderly (65 to 74 year old)                  | 2.695  | < 0.001 | 14.807 | 10.241                  | 21.409 |

B: Regression coefficient; p-value: Statistical significance; OR: Odds ratio.
