# Supplementary material for: Influence of Socioeconomic Status on Oral Disease Burden: a Population-based Study
Source: Research Square preprint supplement (doi:10.21203/rs.3.rs-41112/v2), 2021-07-19
Supplement: Supplementary file 3 [file c0fedf53347fa38d08b957c2.pdf]

Table 2. Multivariate and adjusted negative binomial regression of ODB and the independent variables.

|                                              | B     | p-<br>value | PR    | 95% confidence<br>interval |       |
|----------------------------------------------|-------|-------------|-------|----------------------------|-------|
|                                              |       |             |       | Lower                      | Upper |
| <b>Skin color</b>                            |       |             |       |                            |       |
| White                                        | Ref.  |             | 1     |                            |       |
| Nonwhite                                     | 0.081 | < 0.001     | 1.084 | 1.058                      | 1.111 |
| <b>Family income</b>                         |       |             |       |                            |       |
| Up to R\$1,500.00/month                      | 0.075 | < 0.001     | 1.078 | 1.054                      | 1.103 |
| Over R\$1,501.00/month                       | Ref.  |             | 1     |                            |       |
| <b>Education</b>                             |       |             |       |                            |       |
| Primary education                            | 0.149 | < 0.001     | 1.161 | 1.126                      | 1.196 |
| Secondary or higher education                | Ref.  |             | 1     |                            |       |
| <b>OIDP</b>                                  |       |             |       |                            |       |
| No impact of oral health on daily activities | Ref.  |             | 1     |                            |       |
| Impact of oral health on daily activities    | 0.230 | < 0.001     | 1.258 | 1.229                      | 1.288 |
| <b>Age group</b>                             |       |             |       |                            |       |
| Teenager (15 to 19 years old)                | Ref.  |             | 1     |                            |       |
| Adult (35 to 44 years old)                   | 0.998 | < 0.001     | 2.712 | 2.590                      | 2.841 |
| Elderly (65 to 74 year old)                  | 1.048 | < 0.001     | 2.851 | 2.716                      | 2.992 |

B: Regression coefficient; p-value: Statistical significance; PR: Prevalence ratio.
